# Supplementary material for: Analysis of pcC13-62 promoters predicts a link between cis-element variations and desiccation tolerance in Linderniaceae
Source: PubMed Central journal article supplement — J Exp Bot. 2018 May 11;69(15):3773–84. doi: 10.1093/jxb/ery173 (PMC6022661; doi:10.1093/jxb/ery173), 2018-05-11
Supplement: ery173_suppl_supplementary_table_figures.pdf [file ery173_suppl_supplementary_table_figures.pdf]

**Supplementary Table S1** List of primers used in this study.

|                       | <b>Primer</b>            | <b>Sequence (5'-3')</b>                |
|-----------------------|--------------------------|----------------------------------------|
| <b>Genome walking</b> | Cp13-62GW_iso1_R1        | GAAGAACTCGGCTTCAAGCAACTC               |
|                       | Cp13-62GW_iso1_R2        | GTTCAAAGGGAAGCTCTAAGAGACTAA            |
|                       | Cp13-62GW_iso2_R1        | GGGTTGGAATCTTGGCATAGCTC                |
|                       | Cp13-62GW_iso2_R2        | GCCAATATGGAAGTGCTGCAAAG                |
|                       | Ls13-62GW_R1             | TTATTATTAATGCGGCGGCGAAGGT              |
|                       | Ls13-62GW_R2             | TCGTTTTCTTTCTTTGCTGGGTCGT              |
| <b>Gene cloning</b>   | Cp13-62g_iso1_F          | CAAACGGAGGGCTAGATTCAT                  |
|                       | Cp13-62g_iso2_F          | CCTTCTTCGAAGCTTCATCAC                  |
|                       | Cp13-62g_iso1+2_rev      | CTAAAACACACAGCCATGTACGA                |
|                       | Lb13-62g_F               | ACTCCACCGGTCCACTTCTTC                  |
|                       | Lb13-62g_R               | TTCGGTAAATCGTGGGAGAAAAGAGAG            |
|                       | Lb13-62g2_F              | GTGAAGATCATCTAGATCAACGTACGAG           |
|                       | Ls13-62g_F               | CAACCCCTCGAGAAACCTAA                   |
|                       | Ls13-62g_R               | CATGCATGCAAGACGATTATT                  |
| <b>GUS analysis</b>   | Cp13-62p_F               | CACT <b>TCTAGAT</b> TCTCCACTTCTTCTT    |
|                       | Cp13-62p_iso1+2_frag_F   | ACCC <b>TCTAGAG</b> GCTATTACTCGTCTG    |
|                       | Cp13-62p_R               | TGTG <b>CCATGG</b> TTTGCTGCTGTG        |
|                       | Lb13-62p_F               | GTGT <b>GTCGAC</b> CATCTAGATCAACGTACG  |
|                       | Lb13-62p_frag_F          | GAAAT <b>TCTAGAT</b> TACTCGTCAGCCATCCA |
|                       | Lb13-62p_R               | TGTG <b>CCATGG</b> TTGATGCTGCGGCTTGA   |
|                       | Ls13-62p_F               | CACT <b>TCTAGAT</b> TCTCCACTTCTTTGCT   |
|                       | Ls13-62p_R               | TGTG <b>CCATGG</b> TGCGCGGCGCGT        |
| <b>Mutagenesis</b>    | Cp13-62p_iso1_c845t_F    | GGTTCTACACCTGTCAGGCTTTCGACGGAGG        |
|                       | Cp13-62p_iso1_c845t_R    | CCTCCGTCGAAAGCCTGACAGGTGTAGAACC        |
|                       | Cp13-62p_iso2_c904t_F    | CTCCGGCCAAAGCCTGACAGCTGTAGAAC          |
|                       | Cp13-62p_iso2_c904t_R    | GTTCTACAGCTGTCAGGCTTTGGCCGGAG          |
|                       | Lb13-62_c662t_R          | AGTTTTTACACGTGTCAGGCTGTGGCGGAAGG       |
|                       | Lb13-62_c662t_F          | CCTTCCGCCACAGCCTGACACGTGTAAAAACT       |
|                       | Ls13-62_c623t_F          | TCGACACCTGTCGGGCTGCCGCCG               |
|                       | Ls13-62_c623t_R          | CGGCGGCAGCCCGACAGGTGTCSA               |
| <b>RT-qPCR</b>        | Cp13-62iso1_qPCR_F       | GCAAATCGCCAAGTCTCATT                   |
|                       | Cp13-62iso1_qPCR_R       | CATCATCGTCGTCACTGCTT                   |
|                       | Lb13-62_qPCR_F           | CATCTCCATGGTCCTTTAAGC                  |
|                       | Lb13-62_qPCR_R           | TCCTAAACACACTCAGCCACA                  |
|                       | Ls13-62_qPCR_F           | GTA                                    |
|                       | Ls13-62_qPCR_R           | TCGTTCCCACTCCCATAGAC                   |
| <b>RT-PCR</b>         | Cp13-62iso1_RT-PCR_F     | CCTGGCATCATGAGAAGGAT                   |
|                       | Cp13-62iso1_RT-PCR_R     | GAACTCTGAATCGCCCTGAC                   |
|                       | Lb13-62_RT-PCR_F         | AACCTCAGGCAACATACTCG                   |
|                       | Lb13-62_RT-PCR_R         | CCTAAACACACTCAGCCACA                   |
|                       | Ls13-62_RT-PCR_F         | TGAGAAACAAGCTGGGGAAC                   |
|                       | Ls13-62_RT-PCR_R         | AGGTGAGATCTGGCGATTTG                   |
|                       | CpEF1 $\alpha$ _RT-PCR_F | AGTCAAGTCCGTCGAAATGC                   |

|        |                          |                          |
|--------|--------------------------|--------------------------|
| RT-PCR | CpEF1 $\alpha$ _RT-PCR_R | CACTTGGCACCCCTTCTTAGC    |
|        | LbEIF5A_RT-PCR_F         | GGGAAAGGACCTTGTTGTGA     |
|        | LbEIF5A_RT-PCR_R         | TGGGCTCATTACTCCACTGA     |
|        | LsEIF5A_RT-PCR_F         | TGGGTGGTTTTTATCAATGTCC   |
|        | LsEIF5A_RT-PCR_R         | GGTTGAGTGATAACACAGTAGCAA |
|        | Ot13-62_RT-PCR_F         | ACACCGCAGGCCAAGAAG       |
|        | Ot13-62_RT-PCR_R         | TAGATGAAGCTCCTGGCGATG    |
|        | OtALAD_RT-PCR_F          | GATGAGGCAGAAGGAGCAGAT    |
|        | OtALAD_RT-PCR_R          | GGCGAAGTAGGACAGGATGAT    |

**Supplementary Figure S1**

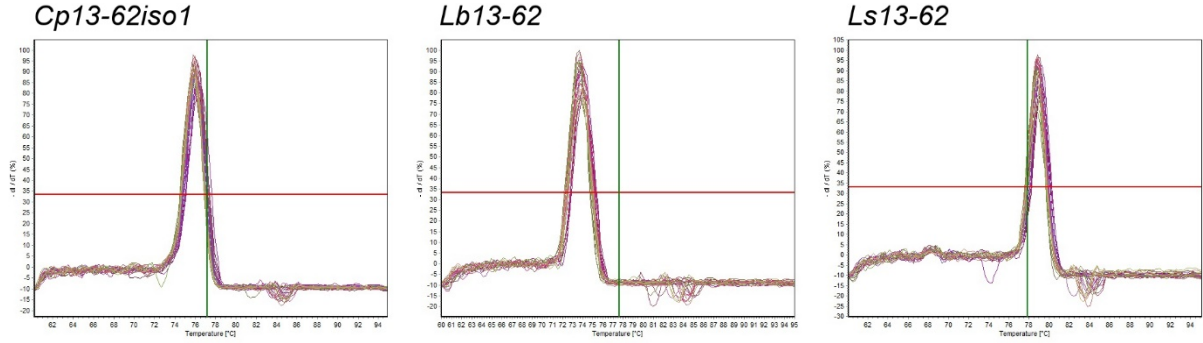

**Supplementary Figure S1** Specificity of the primer pairs used to amplify 13-62 in RT-qPCR amplifications. Dissociation curves were obtained from three biological repeats with three technical repeats each.

## Supplementary Figure S2

**A**

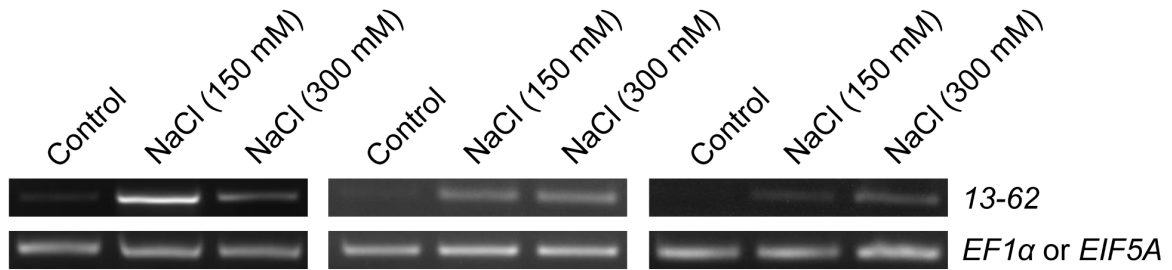

**B**

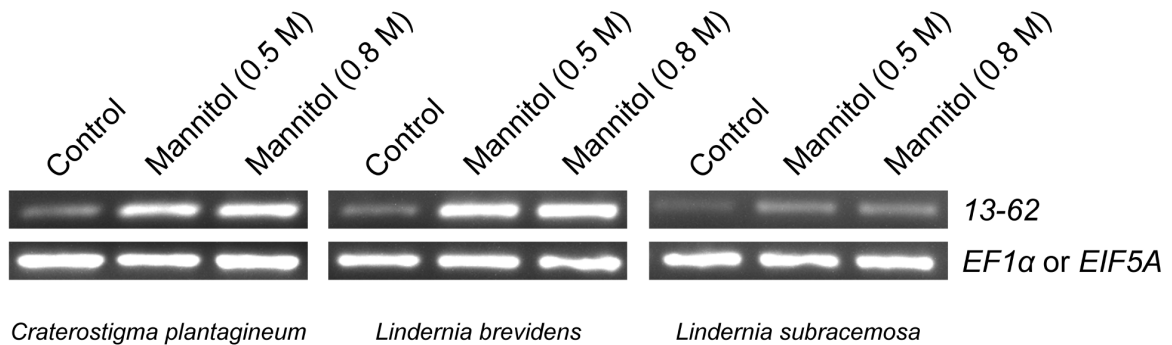

**Supplementary Figure S2** RT-PCR analysis of *Craterostigma plantagineum*, *Lindernia brevidens*, and *Lindernia subracemosa* 13-62 expression in response to salt and osmotic stress. (A) 13-62 expression in response to salt treatments. cDNA was prepared from detached leaves incubated for 24 h in water (control), or in either 150 mM or 300 mM NaCl solutions (B) 13-62 expression in response to mannitol treatments. cDNA was prepared from detached leaves incubated for 48h in water (control), or in 0.5 M or 0.8 M mannitol solutions. cDNA samples in (A) and (B) were amplified with primers specific for the Cp13-62 (Cp13-62\_RT-PCR\_F and Cp13-62\_RT-PCR\_R), Lb13-62 (Lb13-62\_RT-PCR\_F and Lb13-62\_RT-PCR\_R), or Ls13-62 (Ls13-62\_RT-PCR\_F and Ls13-62\_RT-PCR\_R) transcripts. Expression of the elongation factor 1 $\alpha$  (*EF1 $\alpha$* ) gene or of the eukaryotic translation initiation factor 5A (*EIF5A*) gene was analysed as a control for cDNA preparations of *C. plantagineum* or *L. brevidens* and *L. subracemosa*, respectively. All primer sequences are listed in Supp. Table 1.

# Supplementary Figure S3

```
NP_001149373.1_Z.mays 1 MGAPAL-SSV-----V-VV---A-TAAVVC-LCGAF-AQ-AQ-- 28
Ot13-62_O.thomaeum 1 MGAPT I-SSV-----V-VM---T-LAVAVA-LCGGG-AR-AG-- 28
XP_006393503.1_E.salsugineum 1 MGISRE-KRS-----LLVS---T-VMLLFF-FNIIH-LRQ-V-- 29
XP_003579663.1_B.distachyon 1 MGAPAG-FVV-----M-AS---V-V-LAVS-LCGGV-GR-AQ-- 27
XP_002447761.1_S.bicolor 1 MGIPASSSS-----VAVV---V-ATVVVC-LCGAL-AR-AQAQ 32
XP_003542185.1_G.max 1 MAPYIS-RD-----RASIFVLLASLVPL-ILLDY-SS-S-- 31
BAJ94922.1_H.vulgare 1 MGPPAT-VVV-----V-AL---V-A-V--A-LCVGV-CR-AQ-- 25
XP_015634158.1_O.sativa 1 MAAPVT-FAV-----V-AA---V-A-L-VA-LCGGGGAR-AQ-- 27
Cp13-62iso1_C.plantagineum 1 MAQQPT-FAS-----AAL---V-SFFLAL-IC-SC-SY-A-- 26
Cp13-62iso2_C.plantagineum 1 MAQQPT-FAS-----AAL---V-SFFLVL-ICSSC-SY-A-- 27
Lb13-62_L.brevioidens 1 MAQQRP TIAA-----ALT---I-SFCLLMQLC-SC-SL-F-- 28
Ls13-62_L.subracemosa 1 MAQQPT-FAA-----ALI---I-SFFLML-IC-SC-SY-S-- 26
NP_564518.1_A.thaliana 1 MALTKE-RRS-----LLVS---M-VLVFFF-FNFHH-L-Q-V-- 28
XP_002273659.2_V.vinifera 1 MASHIS-LTT-----A-SL---I-V-FLVL-LPIS----- 22
XP_002311374.1_P.trichocarpa 1 MAELFT-STT-----IATI---IASLILL-LVPI SC-SSP-- 29
XP_008458324.1_C.melo 1 MGEYDM-SII-----TAAA---VSYL IILH-LPIHC-NAI--- 29
XP_003594696.1_M.truncatula 1 MAPNYV-NRV-----TASI---V-VLHAFI-ILTQI-SC-S-- 28
XP_010269493.1_N.nucifera 1 MATEFT-YRL-----SLL---L-FLFTR-LSAGS-NL-QV-- 28
NP_001150304.1_Z.mays 1 MARARD-AAL-----HLLL---LAAGALL-LAVVS-QA-T-- 29
XP_015167984.1_S.tuberosum 1 MILLV-----SFL---L-ILHLLS-S-SC-D----- 19
XP_004240220.1_S.lycopersicum 1 MILLV-----SLL---L-LILHLLS-S-SC-D----- 19
XP_016461771.1_N.tabacum 1 MRLAQF--S-----ALF---F-LLLQLPSLT-YC-IE-AA-- 26
XP_006838114.2_A.trichopoda 1 MAMPSY-FSL-----SI---I-LFLFSH-QALAE-T----- 24
NP_191832.1_A.thaliana 1 MF-----K-----CL---V-LVLVIA-VDANP-AK----- 20
XP_015632037.1_O.sativa 1 MCCCCF-TINSQEADVQKNTTHELMNN---LQSEMASPRICCSA---L-LVLLLV-SSCNA-GD-HP-- 56
LOC_Os05g05920.1_O.sativa 1 MAARAR-RAV-----AVAV---A-VLHLL-LTASQ-LA-AP-- 29
XP_003594692.1_M.truncatula 1 MATHYT-SRV-----TISI---V-VLLASL-IT----- 23
XP_003546306.2_G.max 1 MHHHFG-KKN-----LKNMAMPQISRG-----RVPVVLV LSLVPL-LFQEY-SS-S-- 44
XP_011071364.1_S.indicum 1 MAFLSA-STT-----ST-----TAAF---I-ALLLH-LH-GC-S-- 27
XP_002965677.1_S.moellendorffii 1 MGLIFG-TSS-----V-VV---L-ILLFSG-FFVSY-AH-DE-- 28
XP_002519269.1_R.communis 1 MALPIS-TD-----IAL-----LILL-LVPI SY-SYP-L-- 25
XP_008353161.1_M.domestica 1 MATFTY-ATT-----TAI-----VFLIL-LPLSC-SSESI-- 27

29 DMDSEWA-----RPAY-RGFFG----APA-----GSLLPQSDVDLLEFPLNLEY 67
29 DMDNEWA-----RPPY-RGYYG----PP-----GSMLPQSDVDLLEFPLNLEY 66
30-----M-SCPE-----PT-----ASNCTDQDRKLEFPLNLEY 56
28 DMDNEWA-----R--Y-RGFF----GGG-----GTLLPQSDVDLLEFPLNLEY 63
33 DMDKEWA-----RPPY-RGFFG----AP-----GSLLPQSDVDLLEFPLNLEY 70
32-----VLF-----AS-----AKFPKSKDADLLEFALNLEY 56
26 DMDNEWA-----R--Y-RGFFG----GGG-----GTMLPQSDVDLLEFPLNLEY 64
28 DMDNEWA-----R--N-RGFFYV-GTGGGVV---GGLLPQSDVDLLEFPLNLEY 68
27-----AWH-----HE-----KDDIPKSDVSLLEFPLNLEI 51
28-----AWH-----HD-----KDHLPKSDVDLLEFPLNLEI 52
29-----SHDLPKSDVNMLEFPLNLEY 48
27-----G-A-----DS-----ERDLPQSDVQLEFPLNLEY 50
23-----TSCPD-----QA-----TTNCTDQDRKLEFPLNLEY 55
29-----Y-----GGSVPESDIDLVEFPLNLEF 43
30-----FITDG-----SR-----DSPIPQSDIDLLEFPLNLEY 56
30-----V--R-----GE-----NNFIPQSDVDLLEFPLNLEY 53
29-----F-----VL-----TPPKNYSVDVLEFPLNLEY 51
29 S--SAVS-----HQPSCGPNYP-----PH-----AIPVYANDVDLQFAMNIEF 65
30 V-----VPPS--VPAGAPEPRCALAP-----RRG-----ALAVYPSDMEQLQFLNAKF 73
20-----EYFI-----ND-----KNNVTKSDVDLLEFPLNLEY 45
20-----EYFI-----ND-----GNLTKSDVDLLEFPLNLEY 45
27 N-----HEFFMDCD--NNA-----NYHVGPQSDVDLLEFPLNLEY 58
25-----YSC-----PH-----NENLLQGDVLEFPLNLEY 49
21-----AAVGAELFHG-GV--GGGGGGEAQCSAAAPHTPVAVFAHDVDPVRFALLNEF 112
57 ACPAAWS-----AAVGAELFHG-GV--GGGGGGEAQCSAAAPHTPVAVFAHDVDPVRFALLNEF 112
30 AL-SAMAPPAAPLPG--SADPRCHASPP-----RRG-----AVAVYPSDMAHQFLNAKF 77
24-----V-----VA-----TKETTLSDVDLLEFPLNLEY 46
45-----SVF-----IA-----SASASESDVDLLEFPLNLEY 69
28-----IA-----AQAPNSDVDLMEFPLNLEY 47
29 EACGEV-----S-SAAF-----AP-----KQDVTDPDKKLLAFPLNLEY 61
26 N-----ILLDV-----LA-----KSSIPQSDVDLLEFPLNLEY 53
28 L-----HHHHH-----DG-----NSSVQKSDVDLLEFPLNLEY 55

68 LETEFFCWSALGYGLDAIDANLTGGGPPSIGGQSA SLT-PFIRDVATQFCYQEVGHRLA IKQTV--RGFP 134
67 LETEFFCWSALGYGLDKIDANLTGGGPPSIGGQSA SLT-PLIRDIATQFCYQEVGHRLA IKQTV--RGFP 133
57 LEAEFFLFGALGFLGDKVEPNLTGGGPPSIGAQKAKLD-PLTRDVLQFQAWQEVGHRLA IKKTV--RGFA 123
64 LEAEFFCWSALGYGLDIDVNLTMGGPPVGAQTAALT-PFVRDVTQFCYQEVGHRLA IKQNV--RGFP 130
71 LETELFCWSALGYGLDAIDANLTGGGPPSIGGQSA SLT-PLIRDVASQFCYQEVGHRLA IKQTV--RGFP 137
57 LEAEFFLFGALGHGLDVAARNLTGGGPPSIGAKKVELD-SLTDVILQFAWQEVGHRLA IKSQV--RGFP 123
65 LEAEFFCWSALGYGLDIDVNLTMGGPPSIGQTAALT-PFVRDVTQFCYQEVGHRLA IKQTV--RGFP 131
69 LEAEFFCWSALGYGLDIDASLTGGGPPAVGQAQTAALT-PFVRDVTQFCYQEVGHRLA IKQNV--RGFP 135
52 LEAEFFAWAALFKGIDLEPELAKGGPPSIGVQKANLS-PFIRDIIAQFAYQEFVGHRA IQSSV--EGFP 118
49 LEAEFFSWAALGKGLDEPELAKGGPPSIGVQKANLS-PFIRDIIAQFAYQEFVGHRA IQSSV--EGFP 119
53 LEAEFFAWAALFKGIDLEPELAKGGPPSIGVQKANLS-PFIRDIIAQFAYQEFVGHRA IQSTV--SGFP 117
51 LEAEFFAWGALGGGLDEFQDLAKGGPPSIGVQKANLS-PFIRDIIAQFAYQEFVGHRA IQSTV--SGFP 117
56 LEAEFFLFGALGFLGDKVAPNLTGGGPPSIGAQKAKLD-PLTRDVLQFQAWQEVGHRLA IKKTV--RGFA 122
44 LEAEFFLWGSQGYGLDTVAANLSKGGPPVGAQKATLD-PFIRDVILQFAWQEVGHRLA IQSIV--KGFP 110
57 LEAEFFLWGSQGYGLDTVAANLTGGGPKPLGAKKANLD-PYTRDVIKQFAWQEVGHRLA IKDTV--QGFP 123
54 LEAEFFLYGSLGYGLDKVAPNLTGGGPPSIGAKKAKLD-PFIRDIILQFQYQEVGHRLA IKNTV--KGFP 120
52 LEAEFFLFGSLGHGLDVAPELAKGGPPSIGAKVARG-LDVRDVIILQFQYQEVGHRLA IKSTV--RGFP 118
66 LEAEFFLVGLGYGLDKIAPQLVMGGPPSIGTRKANLD-NLTQMLITQFAWQEVGHRLA IKTTV--GGIP 132
74 VEAEFFLHAAALGRGVDLDRNLTGGGPPSPGAKKAKLD-FRTTEVAALGYQEVGHRLA IROAV--GGFP 140
46 MEAEFFLWGSALGYGLDKFAPQLADGGPKPIGVRIAKLS-PLIRDVIAQFQYQEVGHRLA IKETV--RGFP 112
46 MEAEFFLWGSALGYGLDKFAPQLADGGPKPIGVRIAKLS-PLIRDVIAQFQYQEVGHRLA IKSTV--RGFP 112
59 LEAEFFLWAAAFGRGLDSFSDLAAGGPPSIGARIKLS-PLIKDVIKQFAWQEVGHRLA IKKTI--AGFP 125
50 TEAEFFLWAAAFGRGLDEYDRKLAAGGPPSIGARIKLS-PFTRDVIKQFAWQEVGHRLA IKSTV--RGFP 116
47 TEAEFFLKGATKGLDAYNATLAKGGPPSIGAKKANLD-PITNRIIEEFGYQEVGHRLA ITDMT--GGIP 113
113 EAEEFFLHAAAFVGLDHLAPNLTGGGPPVGAQKAGLD-ELTRVCAEAYQEVGHRLA IRTV--GGIP 179
78 VEAEFFLHGAALGRGIDFIDGALSGGGPPPTGAKKATLD-FRATEVAALGYQEVGHRLA IQSM--GGFP 144
47 LEAEFFLWGSALGYGLDVAPELAKGGPPSIGAKKAKLDKDRKI KQIIFELQYQEVGHRLA IKSTV--KGFS 114
78 LEAEFFLFGSLGHGLDVAPELAKGGPPSIGARLARLE-NLIRDIILQFQYQEVGHRLA IKSTV--RGFP 114
48 LEAEFFSYGALGGGVETAAPNLTGGGPPSVGGRKACL-PLIRDIIAQFQYQEVGHRLA IKSTV--RGFP 114
62 LETEFFAYGALGYGLDKLDPGLAENGPAKGAQKAKLD-ILRDIIVIAQFQYQEVGHRLA IKGVVKEEFG 130
54 LEAEFFLYGSLGGLDVAPELNTSGGPPSIGAKKANLD-PFTRDVIKQFAWQEVGHRLA IKNVV--KGFP 120
56 LEAEFFLYGSLGYGLDKVYPSLAQGGPPSIGAKKAKLD-HFTRDVIKQFAWQEVGHRLA IKQTV--KGFP 122
```

NP\_001149373.1\_Z.mays 135 RPLLDISAANFGKIEQALNMTDPFFDPYENSLNFLVASYIIPYVGLTGYVGANRLLTPQARKLLAGL 204

Qt13-62\_O.thomaeum 134 RPLLDISAANFGKIVETAMNTDPFFNPYENSVNFIASYIIPYVGLTGYVGANPKLFTPOAKKLLVAGL 203

XP\_006393503.1\_E.salsugineum 124 RPLDLKSKKFAKVMDDAFGRKFVPPFNPNYANSFNLIASYLVVYVGLTGYVGANPKLQCPESRKLVL 193

XP\_003579663.1\_B.distachyon 131 RPLLDISAANFGKIEQALNMTDPFFDPYENSLNFLVASYIIPYVGLTGYVGANRLLTPQARKLLVAGL 200

XP\_002447761.1\_S.bicolor 138 RPLLDISAANFGKIEQALNMTDPFFNPYENSVNFIASYIIPYVGLTGYVGANRLLTPQARKLLVAGL 207

XP\_003542185.1\_G.max 124 RPLLDLSSKFAKLMONAFGKPLVPPFDPYANSLNFIASYVYVYVGLTGYVGANRLLQSATSRELVAGL 193

BAJ94922.1\_H.vulgare 132 RPLLDISAANFGKIEQALNMTDPFFNPYENSLNFIASYIIPYVGLTGYVGANRLLTPQARKLLVAGL 201

XP\_015634158.1\_O.sativa 136 RPLLDISAANFGKIVETAMNTDPFFDPYENSLNFLVASYIIPYVGLTGYVGANRLLTPQARKLLVAGL 205

Cp13-62iso1\_C.plantagineum 119 RPLLDLSSKSFATVMDSAFGKLEPPFDPYANDINYLACVYVYVGLTGYVGANPKLSPVSRKLLVAGL 188

Cp13-62iso2\_C.plantagineum 120 RPLLDLSSKSFATVMDSAFGKLEPPFDPYANDINYLACVYVYVGLTGYVGANPKLSPVSRKLLVAGL 189

Lb13-62\_L.brevioides 116 RPLLDLSEKSFATIMDDAFGKPLVPPFDPYANDINYLAAVYVYVGLTGYVGANPKLSPKSRKLLVAGL 185

Ls13-62\_L.subracemosa 118 RPLLDLSSAASFATVMNNAFEKPLVPPFDPYANDINYLASYVYVYVGLTGYVGANPKLSPQSRKLLVAGL 187

NP\_564518.1\_A.thaliana 123 RPLDLKSKKFAKVMDDAFGKVFVPPFNPNYANSFNLIASYLVVYVGLTGYVGANPKLQCPASRKLVL 192

XP\_002273659.2\_V.vinifera 111 RPLLDLSSAASFADVMNSAFGKPLVPPFDPYANGLNLLASYVYVYVGLTGYVGTNPNLQGAASKRLLVAGL 180

XP\_002311374.1\_P.trichocarpa 124 RPLLDLSTKSFATMDAAFGRKLEPPFDPYASLHLYIASYVYVYVGLTGYVGANPKLQAASAKRLLVAGL 193

XP\_008458324.1\_C.melo 121 RPLLDLSSAASFADVMNSAFGKPLVPPFDPYANGLNLLASYIIPYVGLTGYVGANPKLSPVSRKLLVAGL 190

XP\_003594696.1\_M.truncatula 119 RPLLDLSSKSFATIMDDAFGKLEPPFDPYANDINYLASYVYVYVGLTGYVGANPKLRLNATSKRLLVAGL 188

XP\_010269493.1\_N.nucifera 133 RPLMDLSPSNFAKIFDQSEGYPLVPPFDPYRDSLASYMLASYVYVYVGLNGYVGANPKLNGYKSRKLLVAGL 202

NP\_001150304.1\_Z.mays 141 RPPIDLGDRAFMVDDAMGVRLEPPFDPYAGPVNLLASYVPHVTAAMAGIGPSLMGYASKRQLQASI 210

XP\_015167984.1\_S.tuberosum 113 RPLLDLSSAASFATVMNNAFEKPLVPPFDPYANDINYLASYVYVYVGLTGYVGANPKLHSPAKRLLVAGL 182

XP\_004240220.1\_S.lycopersicum 113 RPLLDLSSAASFATVMNNAFEKPLVPPFDPYANDINYLASYVYVYVGLTGYVGANPKLHSPAKRLLVAGL 182

XP\_016461771.1\_N.tabacum 106 RPLLDLSSAASFATVMNNAFEKPLVPPFDPYANDINYLASYVYVYVGLTGYVGANPKLHSPAKRLLVAGL 182

XP\_006838114.2\_A.trichopoda 117 RPLLDLSPNNFAKLFDMAFEGHPLVPPFDPYANGLNLLASYVYVYVGLTGYVGANPKLQAYASKRLLVAGL 186

NP\_191832.1\_A.thaliana 114 RPLLDLSSAASFADVMNSAFGKPLVPPFDPYANGLNLLASYVYVYVGLTGYVGTIPLYVFNILKLLVAGL 183

XP\_015632037.1\_O.sativa 180 RPLIDLSSAASFADVMNSAFGKLEPPFDPYANGLNLLASYVYVYVGLINGYGTINLIDYGTATNLLVAGL 249

LOC\_Os05g05920.1\_O.sativa 145 RFAIDLSDAVFAVMDDAMATRLEPPFDPYASSVNFLLASYILPHITAS-----AAAS 198

XP\_003594692.1\_M.truncatula 115 RPLLDLSSKSFATIMDDAFGKPLVPPFDPYANDINFLASYIIPYVGLTGYVGTINPHLQNAASKRLLVAGL 184

XP\_003546306.2\_G.max 137 RPLDLSTASFAKVMNSAFGRPLVPPFDPYANSINYLASYVYVYVGLTGYVGANPKLQNAASKRLLVAGL 206

XP\_011071364.1\_S.indicum 115 RPLMDLSSAASFATVMNNAFEKPLVPPFDPYANDINYLASYIIPYVGLTGYVGANPKLQSPAKRLLVAGL 184

XP\_002965677.1\_S.moellendorffii 131 RPLLDLSSAASFATVMNNAFEKPLVPPFDPYANSINYLASYVYVYVGLTGYVGANPKLQSSDGKRLVAGL 200

XP\_002519269.1\_R.communis 121 RPLLDLSSAASFATVMNNAFEKPLVPPFDPYANSINYLASYIIPYVGLTGYVGANPKLQSSDGKRLVAGL 190

XP\_008353161.1\_M.domestica 123 RPLLDLSSAASFATVMNNAFEKPLVPPFDPYANSINYLASYIIPYVGLTGYVGANPKLQSSDGKRLVAGL 192

NP\_001149373.1\_Z.mays 205 LAVESADDVAIRTLLEYRGMARVPS-M-A-GGVAEITARISDLRNSLGR-RGVKDEGLVY-APELGPEGL 269

Qt13-62\_O.thomaeum 204 LAVESADDVAIRTLLEYRGMARVPS-S-G-VGVAELTAQISELRNELGR-RGVKDEGLVY-MPGQGGPEGI 269

XP\_006393503.1\_E.salsugineum 194 LGVESGQDAVIRALLYARATHIYHP-Y-G-VTVAEFTDRISDLRNLGK-AGVKDEGLVY-PRAMGAEGQ 258

XP\_003579663.1\_B.distachyon 201 LGVESADDVAIRTLLEYRGLSRVAS-Y-G-VGVAEVTAAHISELRNELGR-RGVKDEGLVY-APGEGPEGQ 265

XP\_002447761.1\_S.bicolor 208 LAVESADDVAIRTLLEYHGTARVSS-Y-G-VGVAEVTAAHISELRNELGR-RGVKDEGLVY-APELGPEGL 272

XP\_003542185.1\_G.max 194 LGVESGQDAVIRALLYERKEQLVPP-Y-G-VAVEEFTNRISILRSKLGK-RGLKDEGLVY-PTGLGAEK 258

BAJ94922.1\_H.vulgare 202 LGVESADDVAIRALLYERGLSRVAS-Y-G-VGVAEVTAAHISELRNELGR-RGVKDEGLVY-APGQGGPEGQ 266

XP\_015634158.1\_O.sativa 206 LGVESADDVAIRALLYERHGLSRVAS-Y-G-VGVAELTAHISELRNLVGR-KGVKDEGLVY-APGQGGPEGQ 270

Cp13-62iso1\_C.plantagineum 189 LAVEAGQDAIRALLYERATDKVEP-Y-G-ITVAEFTNKISELRNLGK-KGVKDLGLIY-EPELGAEGK 253

Cp13-62iso2\_C.plantagineum 190 LAVEAGQDAIRALLYERATDKVEP-Y-G-ITVAEFTNKISELRNLGK-KGVKDLGLIY-EPELGAEGK 254

Lb13-62\_L.brevioides 186 LGVESGQDAVIRALLYERKMEKVEP-Y-D-ITVAEFTNKISELRNLGK-KGVKDKGLIY-EPELGAEGK 250

Ls13-62\_L.subracemosa 188 LGVESGQDAVIRALLYERALKKVRP-Y-G-ITVAEFTNRISDLRNLGK-KGLKDKGLIY-EPELGAEGK 252

NP\_564518.1\_A.thaliana 193 LGVESGQDAVIRALLYARAAHIYYP-Y-G-VTVAEFTDQISELRNLGK-AGVKDEGLVY-PKFMGAEGQ 257

XP\_002273659.2\_V.vinifera 181 LGVESGQDAVIRALLYERKAAKHP-Y-G-ITVAEFTYRISDLRNLGK-SGLKDEGLVY-PPVFGAEGK 245

XP\_002311374.1\_P.trichocarpa 194 LAVESGQDAVIRGLLYEYALIRLHP-Y-G-ITVAEFTNRISDLRNLGK-EGIKDEGLVY-PKFGAEGK 258

XP\_008458324.1\_C.melo 191 LGVESGQDAVIRALLYQRAAEKVEP-Y-G-VTVAEFTNRISDLRNLGK-AGIKDEGLVY-PKFGAEGK 255

XP\_003594696.1\_M.truncatula 189 LGVEAGQDAVIRTLLEYRRAKVEP-Y-G-VTVAEFTNRISDLRNLGK-AGIKDEGLVY-PKFGAEGK 255

XP\_010269493.1\_N.nucifera 203 LAVEGQDAVIRHLYYERAGEIYHP-Y-N-YTVAEFTIRISELRNLGK-AGIKDEGLVY-PPELGAENR 267

NP\_001150304.1\_Z.mays 211 LAVEAGQDAVIRLLYQRAADAVP-Y-QG-HVTVAEFTNRISDLRNLGK-CBAGKDEGLVY-DRRQGAENR 277

XP\_015167984.1\_S.tuberosum 183 LGVESGQDAVIRALLYERGRENVEP-Y-G-ITVAEFTNRISDLRNLGK-QGIKDEGLVY-PKFGAEGK 247

XP\_004240220.1\_S.lycopersicum 183 LGVESGQDAVIRTLLEYRGENVEP-Y-G-ITVAEFTNRISDLRNLGK-QGIKDEGLVY-PKFGAEGK 247

XP\_016461771.1\_N.tabacum 196 LGVESGQDAVIRTLLEYRQRAIEKVEP-Y-G-IPVAEFTSQISELRNLGK-QGIKDEGLVY-PKFGAEGK 260

XP\_006838114.2\_A.trichopoda 187 LAVESGQDAVIRALLYERAEDEMKVEP-Y-E-YTVAEFTDRISDLRNLGK-AGIKDEGLVY-PPELGAENR 251

NP\_191832.1\_A.thaliana 184 LGVESGQDAVIRTLLEYRQNEKVEP-Y-G-VTVAEFTNRISDLRNLGK-AGIKDEGLVY-PKFGAEGK 258

XP\_015632037.1\_O.sativa 250 LAVESGQDAVIRMLLEFHRRETVSP-Y-G-ATVAEFTDRISDLRNLGK-CGVKDEGLVY-PELGAEGK 314

LOC\_Os05g05920.1\_O.sativa 199 LAVEAGQDAVIRMLYERAEDEVYAP-Y-KG-RYVAEFTNRISDLRNLGK-CBAGKDEGLVY-DRRQGAENR 265

XP\_003594692.1\_M.truncatula 185 LGVEAGQDAVIRTLLEYRRELKVEP-Y-G-VSVEEFTNRISDLRNLGK-AGIKDEGLVY-PPELGAENR 244

XP\_003546306.2\_G.max 207 LGVESGQDAVIRTLLEYRQASLVYV-Y-K-VTVAEFTDRISDLRNLGK-AGVKDEGLVY-PRVQGAEGS 271

XP\_011071364.1\_S.indicum 185 LGVEAGQDAVIRALLYERAFVYVWP-Y-P-YTVAEFTYRISDLRNLGK-DGLKDEGLVY-VPVQGAEGS 249

XP\_002965677.1\_S.moellendorffii 201 LGVESGQDAVIRTLLEYRQKDTVEP-Y-K-LTVAEFTYRISDLRNLGK-DBLKDEGLVY-PKFGAEGK 266

XP\_002519269.1\_R.communis 191 LAVESGQDAVIRTLLEYRAIEKVEP-Y-K-ITVAEFTDRISDLRNLGK-NBNGKDEGLVY-AKERGAEGQ 255

XP\_008353161.1\_M.domestica 193 LGVESGQDAVIRALLYQRAELKVEP-Y-G-ITVAEFTNRISDLRNLGK-XGLKDEGLVY-PKHLGAEGK 257

NP\_001149373.1\_Z.mays 270 TVGNIIAGDHLSLAYDRTPPEELRIVYVSGSNGSAHQGGFFPQSGADGRIARGLL-----A- 322

Qt13-62\_O.thomaeum 270 TQGNVIAGDHLSLAYDRTPPEELRIVYVSGSNGSQAQGGFFPQSGADGRIARFIIY-----A- 323

XP\_006393503.1\_E.salsugineum 259 VAGNVLVGDKLSLAFDRTPPEELRIVYVSGSNGSVPGGFYPPKADGRIAKSYLV-----K-V- 312

XP\_003579663.1\_B.distachyon 266 TVGNIIAGDRVSLAYDRTPPEELRIVYVSGSNGSVPGGFYPPKADGRIARGLL-----M- 318

XP\_002447761.1\_S.bicolor 273 TVGNVIAGDHLSLAYDRTPPEELRIVYVSGSNGSQAQGGFFPQSGADGRIARGLL-----A- 325

XP\_003542185.1\_G.max 259 VRGNIIAGDVNSLAYDRTPPEELRIVYVSGSNGSDEHVRGGFFYPPKADGRIARGLL-----M- 311

BAJ94922.1\_H.vulgare 267 TVGNIIAGDRVSLAYDRTPPEELRIVYVSGSNGSQAQGGFFPQSGADGRIARGLL-----M- 319

XP\_015634158.1\_O.sativa 271 TVGNIIAGDRVSLAYDRTPPEELRIVYVSGSNGSQAQGGFFPQSGADGRIARGLL-----A- 323

Cp13-62iso1\_C.plantagineum 254 ISGNVLADGDKNSLAFPRTPPEELRIVYVSGSNGSQAQGGFFYPPKADGRIARGLL-----V- 318

Cp13-62iso2\_C.plantagineum 255 ISGNVLADGDKNSLAFPRTPPEELRIVYVSGSNGSQAQGGFFYPPKADGRIARGLL-----V- 319

Lb13-62\_L.brevioides 251 TSGNIIAGDKNLSLAFPRTPPEELRIVYVSGSNGSQAQGGFFYPPKADGRIARGLL-----V- 312

Ls13-62\_L.subracemosa 253 TAGNVLAGDKNLSLAFPRTPPEELRIVYVSGSNGSQAQGGFFYPPKADGRIARGLL-----V- 315

NP\_564518.1\_A.thaliana 258 VIGNVLVGNELSLDFRTPPEELRIVYVSGSNGSQAQGGFFYPPKADGRIARGLL-----V- 315

XP\_002273659.2\_V.vinifera 246 SRGNVLADGDKLSLAFYARKPEELRIVYVSGSNGSQAQGGFFYPPKADGRIARGLL-----L- 303

XP\_002311374.1\_P.trichocarpa 259 IRGNVLADGDEYSIGYARTPEELRIVYVSGSNGSQAQGGFFYPPKADGRIARGLL-----S- 313

XP\_008458324.1\_C.melo 256 IRGNVLADGDKLSLAFYARKPEELRIVYVSGSNGSQAQGGFFYPPKADGRIARGLL-----K- 310

XP\_003594696.1\_M.truncatula 248 FSGNIIADGDKNSLAFYARKPEELRIVYVSGSNGSQAQGGFFYPPKADGRIARGLL-----T- 302

XP\_010269493.1\_N.nucifera 268 TCSNIIADGDKNSLAFYARKPEELRIVYVSGSNGSQAQGGFFYPPKADGRIARGLL-----T- 322

NP\_001150304.1\_Z.mays 278 TISNIIAGDGEDSLGFRTPPEELRIVYVSGSNGSQAQGGFFYPPKADGRIARGLL-----T- 332

XP\_015167984.1\_S.tuberosum 241 IRGNIIAGGKYSLSYDRTPPEELRIVYVSGSNGSQAQGGFFYPPKADGRIARGLL-----L- 299

XP\_004240220.1\_S.lycopersicum 248 IRGNIIAGGKYSLSYDRTPPEELRIVYVSGSNGSQAQGGFFYPPKADGRIARGLL-----L- 299

XP\_016461771.1\_N.tabacum 251 IKGNVLADGDKNSLAFYARKPEELRIVYVSGSNGSQAQGGFFYPPKADGRIARGLL-----G- 320

XP\_006838114.2\_A.trichopoda 262 TSGNIIADGDKNSLAFYARKPEELRIVYVSGSNGSQAQGGFFYPPKADGRIARGLL-----G- 305

NP\_191832.1\_A.thaliana 250 TISNIIADGDKNSLAFYARKPEELRIVYVSGSNGSQAQGGFFYPPKADGRIARGLL-----V- 317

XP\_015632037.1\_O.sativa 315 ICTNIIADGDKNSLAFYARKPEELRIVYVSGSNGSQAQGGFFYPPKADGRIARGLL-----V- 376

LOC\_Os05g05920.1\_O.sativa 266 TVSNIIAGDGEDSLGFRTPPEELRIVYVSGSNGSQAQGGFFYPPKADGRIARGLL-----T- 320

XP\_003594692.1\_M.truncatula 245 IGSTNIIAGDDESSLGFRTPPEELRIVYVSGSNGSQAQGGFFYPPKADGRIARGLL-----S- 299

XP\_003546306.2\_G.max 272 VTDNIIAGDKNLSLAFYARKPEELRIVYVSGSNGSQAQGGFFYPPKADGRIARGLL-----T- 327

XP\_011071364.1\_S.indicum 250 ASGNVLADGDKNSLAFYARKPEELRIVYVSGSNGSQAQGGFFYPPKADGRIARGLL-----L- 303

XP\_002965677.1\_S.moellendorffii 267 IEGNIIAGDKNLSLAFYARKPEELRIVYVSGSNGSQAQGGFFYPPKADGRIARGLL-----F- 325

XP\_002519269.1\_R.communis 256 VRGNVLADGDEYSIGYARTPEELRIVYVSGSNGSQAQGGFFYPPKADGRIARGLL-----G- 311

XP\_008353161.1\_M.domestica 258 VSGNIIAGDDESSLGFRTPPEELRIVYVSGSNGSQAQGGFFYPPKADGRIARGLL-----E- 312

**Supplementary Figure S3** Alignment of amino acid sequences of 13-62 protein homologs in selected Embryophyta.

## Supplementary Figure S4

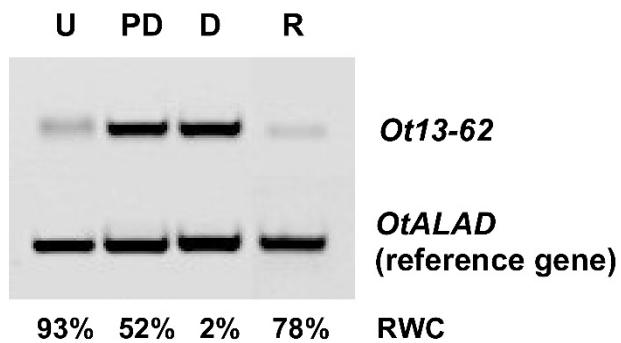

**Supplementary Figure S4** RT-PCR analysis of *Oropetium thomaeum* 13-62 (*Ot13-62*) expression during dehydration and rehydration. cDNA was prepared from untreated (U), partially dehydrated (PD), desiccated (D), and 24 h rehydrated (R) leaves and amplified with primers specific for the *Ot13-62* transcript (*Ot13-62\_RT-PCR\_F* and *Ot13-62\_RT-PCR\_R*, Supp. Table 1). Transcript expression of the aminolevulinic acid dehydratase (ALAD) was analysed as a control for cDNA preparations. Relative water content (RWC) of leaves used for cDNA preparations is indicated.

## Supplementary Figure S5

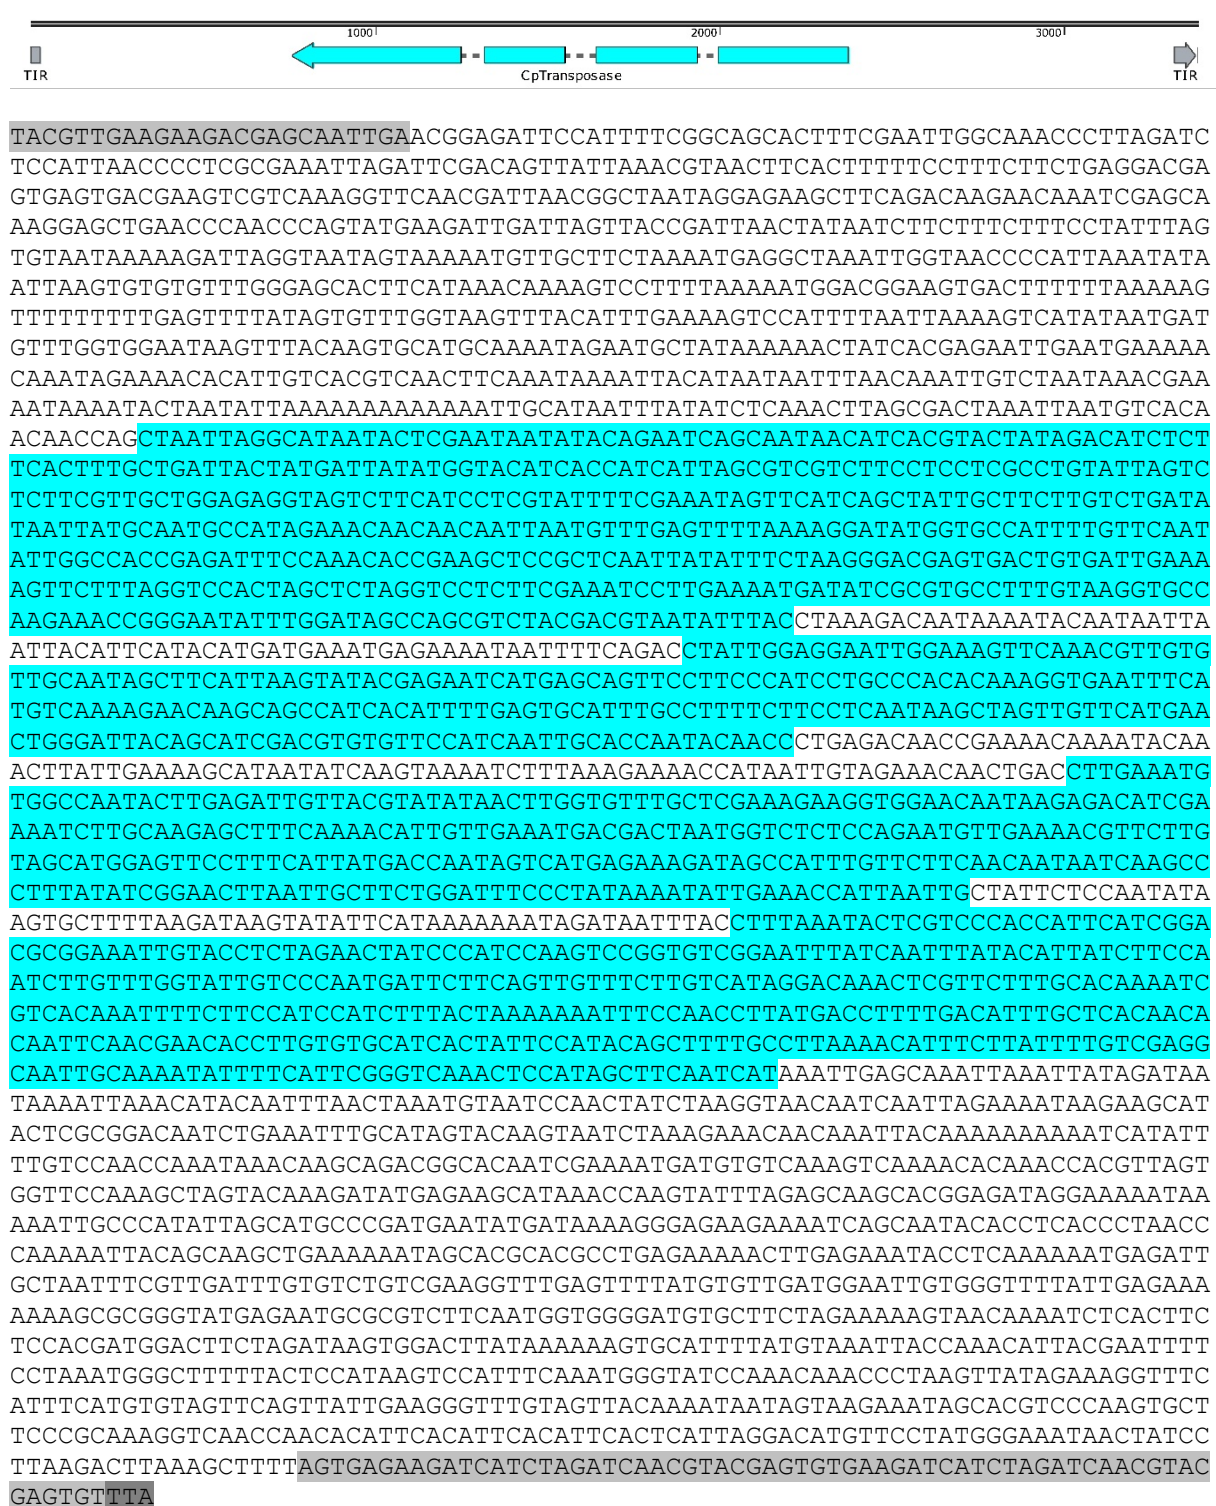

**Supplementary Figure S5** Sequence of the transposable element identified in the *Lb13-62* genomic locus. Putative terminal inverted repeat (TIR) sequences and transposase coding sequence are indicated in grey and light blue, respectively.



## Supplementary Figure S6

Cp13-62\_iso1 -----TGCTTCAAAAAATCTTCTTTTGCTC**CATTG**CACACTCACTGACGATG  
 Cp13-62\_iso2 -----TGCTTCAAAAAAGCTTCTTTTGCTC**CATTG**CACACTCACTGACGATG  
 Ls13-62 CTCCCACCTTCTTTTGCTTCAAAATAACTTCTTTTGCTCCATTTTACACT**CCGAC**GATG  
 Lb13-62 -----

Cp13-62\_iso1 AATACATTGAAGAAGACAAGCACTAT**AAAAGGG**TCCATTTTTTGAGCAGCTTTCATATT  
 Cp13-62\_iso2 AATACATTGAAGAAAAC-----TAT**AAAAGGG**-CCCAATCTTGCAGCAGCTTCCATATT  
 Ls13-62 AATACATTGAAGAAGACAAGCA-----AG-----CACTAGAGCAGATATTTCCATACT  
 Lb13-62 ---CATCTAGATCA**ACGT**-----ACGAGTG---TTTACGACATGAAAATTT**AGA**--  
 \*\*\* \* \*\* \*\* \* \*\* \* \*\* \*

Cp13-62\_iso1 G-GCAA-ACCCTAAAATCTCCATTATCGCCTCTGAAAT**AGATTG**TT**CAACTG**TAAAA  
 Cp13-62\_iso2 G-GCAA-ACCCTAAAATCTCCATTATCGCCTCGTAAAT**AGATTG**TT**CAACTG**TAGAA  
 Ls13-62 CCGCAGCAGCTTTCCAATT**CAATG**GGCAGACCCTTAAATTAGATT**CAACTG**TTAGAAGTA  
 Lb13-62 **AA**GAAAAAGCTTATAGACAAAACGAG-ATATATTGAAAATAAATTATATAAATTCGGTGA  
 \* \* \* \* \* \* \* \* \* \* \* \* \* \* \*

Cp13-62\_iso1 AG--ATGTAACCTTTTTAACTTTGCTCTAATGACTCCGTGA----AA**ACGT**CGTCAATGAT  
 Cp13-62\_iso2 **AG**--ACGCAGCTTTTTAACTTTCTCTAATGACT**ACGT**GAGGAAAA**ACGT**CGTCAATGAT  
 Ls13-62 TGTAACCTCACTTTTT**CACTG**-TACTGATGAG**CAGCTG**AGCAACAGAGCGGTGAAAGAT  
 Lb13-62 GATCATGTATTTTCCCGTAT-GTATTATT---TCTATTATCA**CATTG**TAATGAAATTT  
 \* \*\* \* \* \* \* \* \* \* \* \* \* \* \* \*

Cp13-62\_iso1 TCAACGATTGACA---GAAGTTCAGACAA**AAACCA**CCAAAGTAAAA-----  
 Cp13-62\_iso2 TCAACGATTAACA---GAAGTTCAGATAG**AAACCA**CCAAAGTAAAAGAGCTATGCCAAGA  
 Ls13-62 TCACCGAT**TAACA**AGGAGGTTTTCAGACAAAAACAACCGA-GTAAAG-----  
 Lb13-62 TGATCATATCATATTTTAGTTATGAATAATAATATTTTTTTCTGAC-----  
 \* \* \* \* \* \* \* \* \* \* \* \* \*

Cp13-62\_iso1 -----TAGTCGCTGAAGGGGTGATATTG  
 Cp13-62\_iso2 TTCCA**ACCCA**GTAAGAGCTCTGCTATGCTAATTGCTAATCACTGCAGGGGTGATATTG  
 Ls13-62 -----  
 Lb13-62 -----AGTAGTGAAGTCT

Cp13-62\_iso1 TAATCAACGCATAGT-----TACATGCTTTCA--GTAAAATCGAAATATTACAT  
 Cp13-62\_iso2 TAATTAGATAATAGTAATAAAGGAGTACATGCCATCAATAGTAAAATCGAAATATCACAT  
 Ls13-62 -----C-----TCA-----**ACCCA**-----  
 Lb13-62 ATTTTCAAATAT-----TAAATGGCCTGA-----**AACTTA**ATTGCCCGTT  
 \* \* \*\* \* \*

Cp13-62\_iso1 TCTTACATCTCTAACTTCAAAATCAAACTTTTAATATTGTCTTTTTTCTTTTCAAATT  
 Cp13-62\_iso2 TCTTACATCTCCAACCTTCAAACTTTTAATCTTG---TCTTCTTTTCTTTTCAAATT  
 Ls13-62 -----TCTAACTCC-----TTT**CCTATTTAGGT**-  
 Lb13-62 CATTATATTATGTACGC**ACGT**-----CGGTCAATTA  
 \* \*\* \* \* \*\* \* \*

Cp13-62\_iso1 TGTGTCTTAT---CCACTC**AGAAAG**ATTGAATGTTATTAAACGAATCTATTAGGCTTTCT  
 Cp13-62\_iso2 TGTGTCTTATATCCAACCTC**AGAAAG**ATTGAATGTTATTAAATGAATCTATTAGGCTTT--  
 Ls13-62 -----CAATAAATTAGTACACTAATAG-----TAAAAAGCTTT--  
 Lb13-62 TTT-----TCAAAAT**ACTATTA**TTTCAAGAAATAACCTCCCTAG**ACGT**GTA  
 \* \* \* \* \* \* \* \* \* \* \* \* \*

Cp13-62\_iso1 ATTTAGGCTTTTTTATCTCTGTGAA-ATTTATTTTTATTAATGAAAATTAGCGTTTCGAA  
 Cp13-62\_iso2 -----TTATCTCTGTGAA-ATCTATTTTTATTAATGAAAATTAGCGTTTCGAA  
 Ls13-62 -----CTCTCTAA-AATGAGGTT-----AGACTGAGAAATTACAA  
 Lb13-62 -----ATGTAATAATAACAGTGT**ATGTATCT**TAGACGAAACGGTTCGAA  
 \* \* \* \* \* \* \* \* \* \* \* \* \*

Cp13-62\_iso1 AAATAACTTCAAAATATCGTCTTTTGGCCGA-TATTATTTAGAGAACAACAAAAA---  
 Cp13-62\_iso2 AAATAACTTCAAAATATCGTATTTTGGCTTAGTATTATTAGAGAGAAACAAAAAGAA  
 Ls13-62 AAGTA--TATAGAGT-----TCAGTTATAGAGCGA-----  
 Lb13-62 AGAGTTCTTAATGACAACT-----**CCCTCGTCATA**ACTTGACGGACAATT---**TAAA**  
 \* \* \* \* \* \* \* \* \* \* \* \* \*

Cp13-62\_iso1 -AAGAGGTCGTATGTATCTAGC-AAGGATCTCGACTAAAAACA**CTCGTCAT**CGGTACGAC  
Cp13-62\_iso2 AAAGAGGTCGTATGTATCTAAC-AAGGATCTCGACTAAAAACA**CTCGTCAT**AGGCACGAC  
Ls13-62 --AGATT**CATGTG**TACCCCTCTAATAATAAAGGTCAAAAC-----TGTA**ACTTC**CGCG  
Lb13-62 **TTTAACT**--CACT**CAACTG**TC--GTAATCCCATCTCGAATTTTCTT**CCAAGC**CTTACG  
\* \* \* \* \*

Cp13-62\_iso1 GGTTCACTC-TGTCC**TAATCT**TATCTCTCGACATTTCTAGTTAACGCATTTGAATATATTT  
Cp13-62\_iso2 GGTTCACTC-TGTCC**TAATCT**TATCTCTCG**ACGT**TTCTAGTTAACGC**ACTGAATATATTT**  
Ls13-62 GGC-----C-TGTCCAAATCCCATCTCT-GACTTTTCTT-CTAACGCTTCGA**ACTCA**---  
Lb13-62 AGCCATGCGTAT**ACGT**ATTCCAC**ACACAAG**GCACTTACTTTGCAACAAA-ACAC--  
\* \* \* \* \*

Cp13-62\_iso1 **AATCGAC**GCAGTCAATGTTATCATCGCAATGCATA**CATATG**TCCTCCCAACTAATCACAA  
Cp13-62\_iso2 **AATCGAC**GCAGTCAATGTTGTCATCACAATACATA**CAGATG**TCCTCCCAACTAATCACAA  
Ls13-62 ----**ACGTAA**TCCATCGTTT**GAC**--**TGACAGGA**AAAGGCAACCTCGTAATTTG-----  
Lb13-62 -ATCACCTTAATC**ATCATCCT**TCAAAAATAAA**AAAAAAGAAA**CATAATTTA-----  
\* \* \* \* \*

Cp13-62\_iso1 CCCTTAAAGCTATTACTCGTCTGAAAATAATCCACTTTTCATT**CAACCGCC**TCGCCAC  
Cp13-62\_iso2 CCCTC**CAAAGCTATTACTCGTCTGAAAATAATCCACTTTTCACTACAACCACTTTCCAC**  
Ls13-62 ----CAA-----TTGCTGAGAA**ATCAACCA**CCTTTCATTACAAACATTTGACAC  
Lb13-62 -----CTCGTC----AGCCATCCACCTTTC**ACTACA**GCCACCTCTCCAC  
\* \* \* \* \*

Cp13-62\_iso1 GATCCT**CCGT**CGAAAGC**CCGA**CAGGTGTAGAACCTTGCTCAAACCTATCCGAGCT**TATAAA**  
Cp13-62\_iso2 GATCCTCCGCGCAAGC**CCGA**CAGCTGTAGAACCTTGCTGAAACCTAGCCGAGCT**TATAAA**  
Ls13-62 GATCTTTCGGCGCAGCCTG**ACAGGTG**TCGAAACTTGCGGACACCTATTTCGAGCT**TATAAA**  
Lb13-62 GATCCTTCCGCCACAGC**CCGA**CAGCTGTAAAAACTTTTCGGACACCTATCGAAGCT**TATAAA**  
\*\*\*\*\*

Cp13-62\_iso1 **T**AGCAGCCATGCAACTAAGCGAAGA--CATAGAAAAGAAAAATAAAAAAAAAAAAGCCATC  
Cp13-62\_iso2 **T**AGCAGCCATGCAACTAAGCGAAGAACCAGAGAAAAGAAAAATAATAGAAAAAAAGCCATC  
Ls13-62 **T**TGCATGTCTCAA--AGAGCACGA--CCAGCAAAGAAA-----GAAAACGAACCAT-  
Lb13-62 **T**AGGAGCAAC-CAACAAAGCAACA---CCAGAAACGACAG---AAAACAAGAGCATTT  
\* \* \* \* \*

Cp13-62\_iso1 TTCACACACAGCAGCAAAT**CATG**  
Cp13-62\_iso2 TTCACACACAGCAGCAAAT**CATG**  
Ls13-62 TT**CACGCGCCGGC**---AT**CATG**  
Lb13-62 TTCAAGCCGAGCATCAAT**CATG**  
\*\*\*\* \*

| Name                          | Consensus sequence        | Name             | Consensus sequence    |
|-------------------------------|---------------------------|------------------|-----------------------|
| <b>TATA Box</b>               | TATAAAT                   | <b>BPC1</b>      | AGAAAG                |
| <b>ABRE</b>                   | ACGT                      | <b>ARR10</b>     | AGATT <b>CG</b>       |
| <b>DRE (DREB1B)</b>           | CCGAC                     | <b>GAMYB</b>     | CAACCG <b>CC</b>      |
| <b>MYB1AT</b>                 | WAACCA                    | <b>HSFA1E</b>    | CCGTC <b>G</b>        |
| <b>DRECR</b> T <b>CO</b> REAT | RCCGAC                    | <b>MYB-15</b>    | TAACAA                |
| <b>CBFHV</b> -CRT/DRE         | ATCGAC                    | <b>ASR-1</b>     | ACCCA                 |
| <b>DPBF</b>                   | ACACAAG (ACAC <b>NG</b> ) | <b>AGL15</b>     | TTTCTATTTAG <b>GT</b> |
| <b>MYCCONS</b> USAT           | CANNTG                    | <b>NAC6</b>      | ACGTAA                |
| <b>MYC (erd1)</b>             | CATGTG                    | <b>ATH1</b>      | TGACAG <b>GA</b>      |
| <b>MYC (rd22)</b>             | CAGCTG                    | <b>At4g36620</b> | ATCAAC <b>CA</b>      |
| <b>ATHSFA1D</b>               | ACTACA                    | <b>ERF13</b>     | CACGCGCCG <b>CGCA</b> |
| <b>DOF</b>                    | AAAAAAG <b>AAA</b>        | <b>OCSBF-1</b>   | CAC <b>GT</b>         |
| <b>TEIL</b>                   | ATGTAT <b>CT</b>          | <b>HSFA4A</b>    | ACTAT <b>T</b>        |
| <b>HBP-1a</b>                 | CCCTCGTCAT/CACTCGTCAT     | <b>GT-1</b>      | TAAATTTT <b>AACT</b>  |
| <b>PBF</b>                    | AAAAG <b>GG</b>           | <b>At5g54070</b> | CCA <b>ACG</b>        |

**Supplementary Figure S6** Putative *cis*-acting elements identified in the 13-62 promoter. 13-62 promoter sequences were aligned with ClustalX software. Putative abscisic acid (ABA)- and dehydration-responsive and ABA were identified from

promoter sequences and are indicated on the sequence alignment. The translational start codon is indicated in bold.
